# Supplementary material for: Touch initiated on-demand adhesion on rough surfaces
Source: Royal Society of Chemistry journal article supplement (doi:10.1039/d4mh00331d), 2024-01-01
Supplement: d4mh00331d1.pdf [file d4mh00331d1.pdf]

## Supporting Information

### Touch Initiated On-Demand Adhesion on Rough Surfaces

Zhekun Shi,<sup>a,c</sup> Di Tan,<sup>d</sup> Kangjian Xiao,<sup>a</sup> Xiaolong Zhang,<sup>a</sup> Bo Zhu,<sup>a,b</sup> Zhen Lin,<sup>a</sup> Quan

Liu,<sup>c</sup> Daobing Chen,<sup>a,b</sup> Qinghua Zhang,<sup>c</sup> and Longjian Xue<sup>\*,a,b</sup>

<sup>a</sup> School of Power and Mechanical Engineering, the Institute of Technological Science, Wuhan University, South Donghu Road 8, 430072, Wuhan, China

<sup>b</sup> Hubei Key Laboratory of Electronic Manufacturing and Packaging Integration (Wuhan University), Wuhan University, Wuhan, Hubei 430072, China

<sup>c</sup> Institute of Zhejiang University-Quzhou, Zhejiang Provincial Innovation Center of Advanced Chemicals Technology, Quzhou 324000, China

<sup>d</sup> Institute of Textiles and Clothing, The Hong Kong Polytechnic University, Hung Hom, Kowloon, Hong Kong, China

\* Corresponding author (email: xuelongjian@whu.edu.cn)

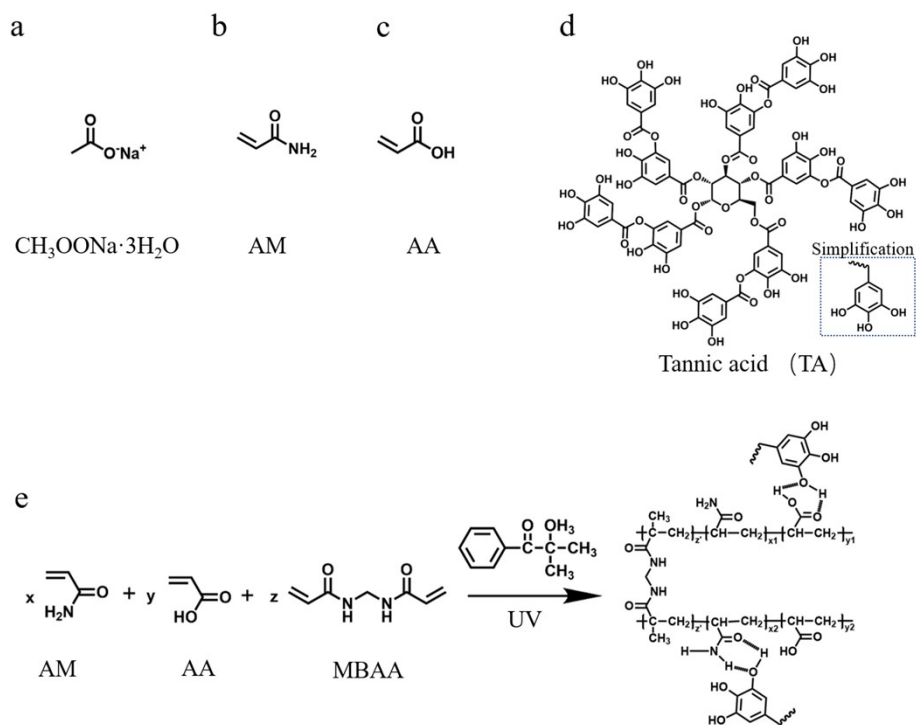

**Figure S1.** Formula of (a) NaAc, (b) AM, (c) AA and (d) TA. (e) The reaction mechanism of the hydrogel with AM and AA monomers.

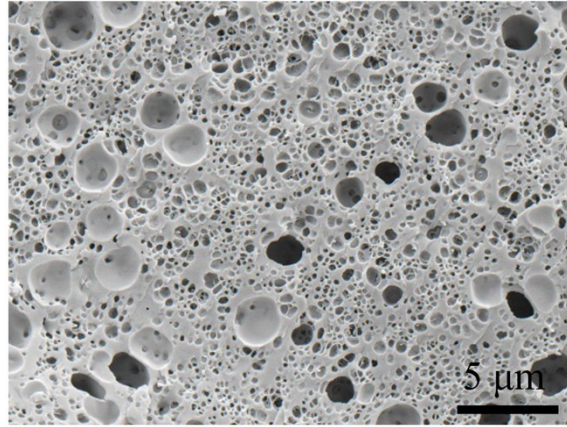

**Figure S2.** The microstructure of hydrogel without NaAc.

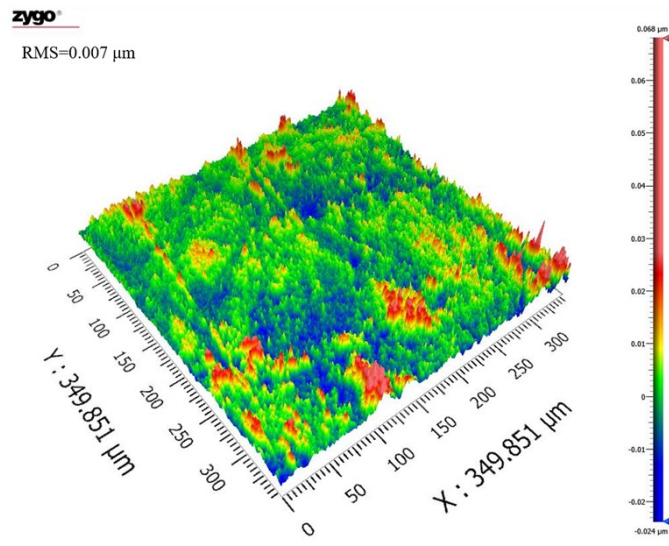

**Figure S3.** 3D profiler images of surfaces of the glass plates.

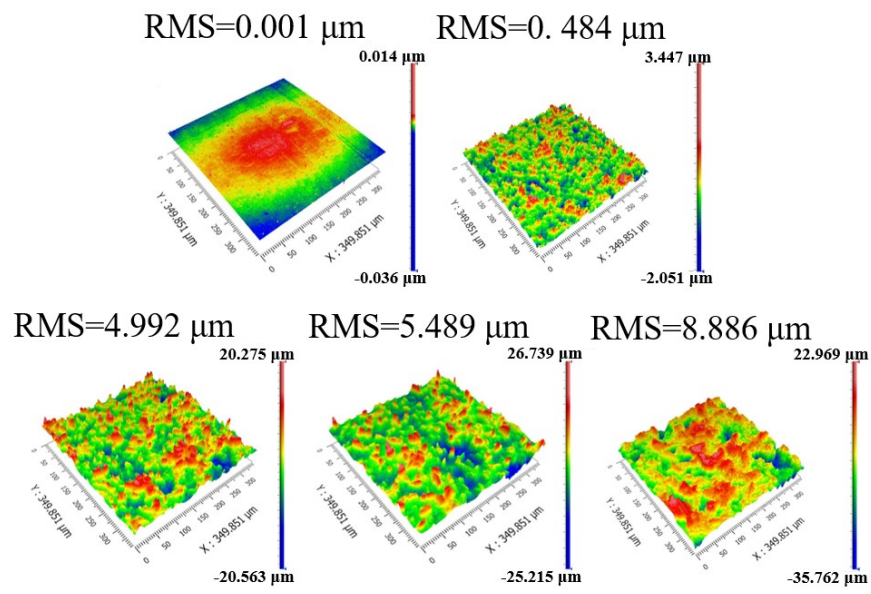

**Figure S4.** 3D morphology of surfaces with different root mean square roughness.

---

**Table S1.** Three adhesion performance tests of TIA on surfaces with different roughness.

| RMS roughness<br>( $\mu\text{m}$ ) | Sample 1#<br>Strength<br>(kPa) | Sample 2#<br>Strength<br>(kPa) | Sample 3#<br>Strength (kPa) | Average Strength<br>(kPa) | Stdev |
|------------------------------------|--------------------------------|--------------------------------|-----------------------------|---------------------------|-------|
| 0.001                              | 454.61                         | 554.56                         | 387.52                      | 465.56                    | 84.05 |
| 0.484                              | 519.99                         | 397.97                         | 410.66                      | 442.87                    | 67.08 |
| 4.992                              | 333.33                         | 360.93                         | 299.57                      | 331.28                    | 30.73 |
| 5.489                              | 280.80                         | 334.29                         | 280.74                      | 298.61                    | 30.89 |
| 8.886                              | 134.30                         | 118.05                         | 102                         | 118.12                    | 16.15 |

---

**Table S2.** The mass and size of the objects being adhered.

| <b>Material</b> | <b>Mass (g)</b> | <b>Dimension (mm)</b> |
|-----------------|-----------------|-----------------------|
| Metal           | 14.28           | 65.16 x 114.54        |
| Glass           | 13.30           | 39.94 x 26.41         |
| Ceramic         | 7.93            | 52.66 x 20.11 x 6.38  |
| Teflon          | 42.74           | 65.28 x 49.52         |
| PC              | 31.39           | 58.02 x 42.97 x 21.08 |
| Rubber          | 64.55           | 13.94 x 39.92         |
| Cork            | 59.04           | 95.73 x 30.99         |
| Paper           | 4.83            | 80.57 x 64.78 x 24.16 |

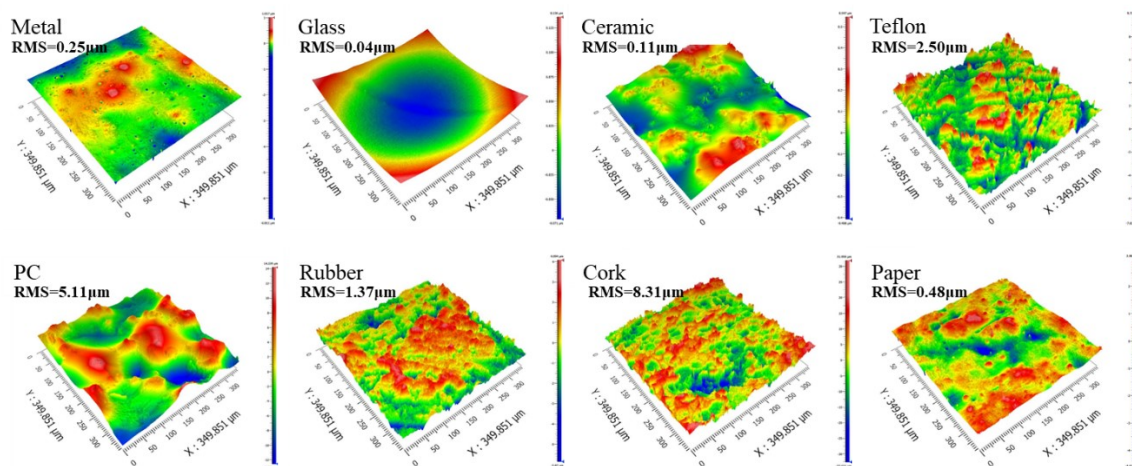

**Figure S5.** 3D profiler images of surfaces of different adhered objects.



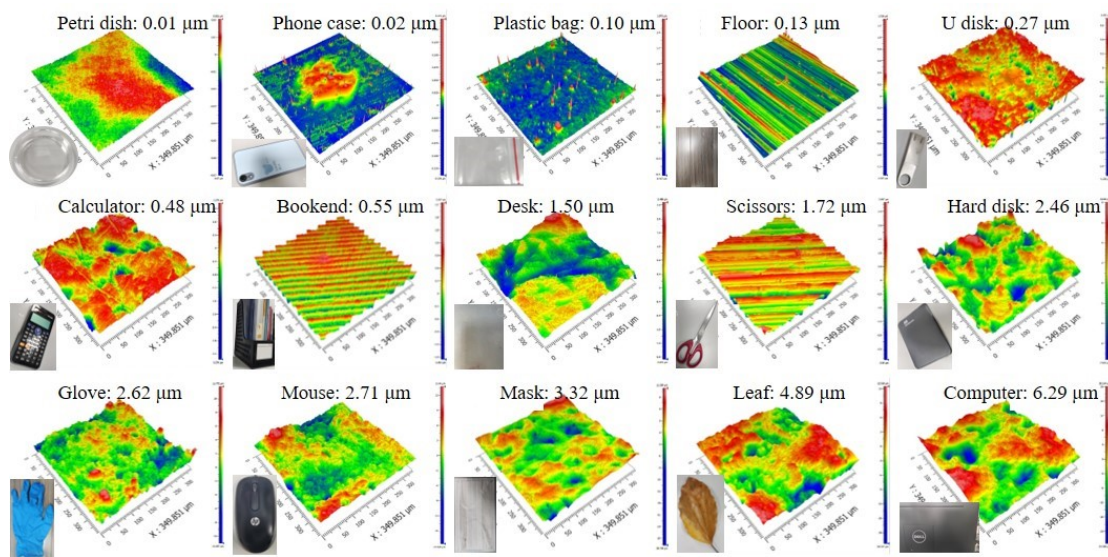

**Figure S6.** Surface roughness of some objects in office.

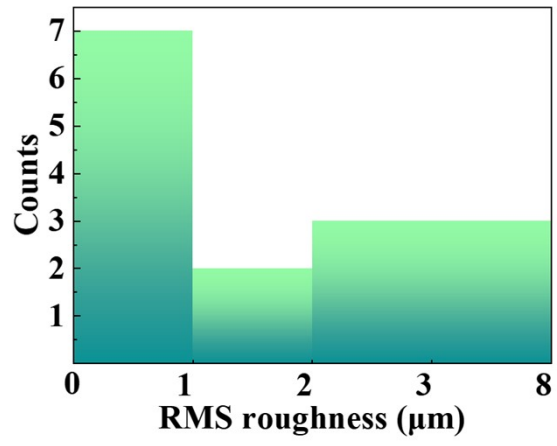

**Figure S7.** Roughness statistics of different objects in office.

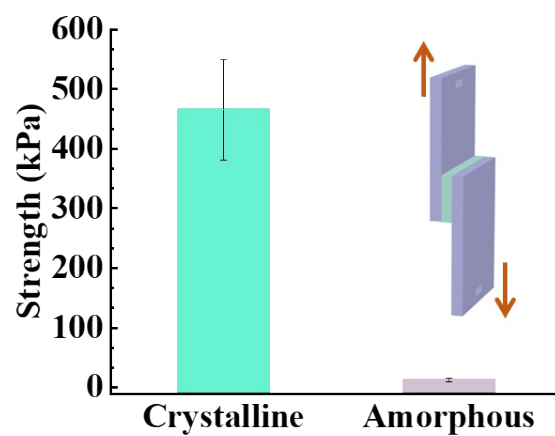

**Figure S8.** Adhesion strength of TIA in amorphous and crystalline states. Inset is the schematic diagram of adhesion test.

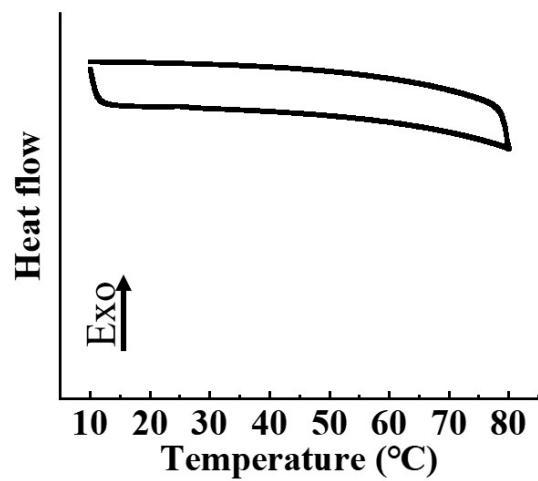

**Figure S9.** DSC curve of hydrogel without NaAc.

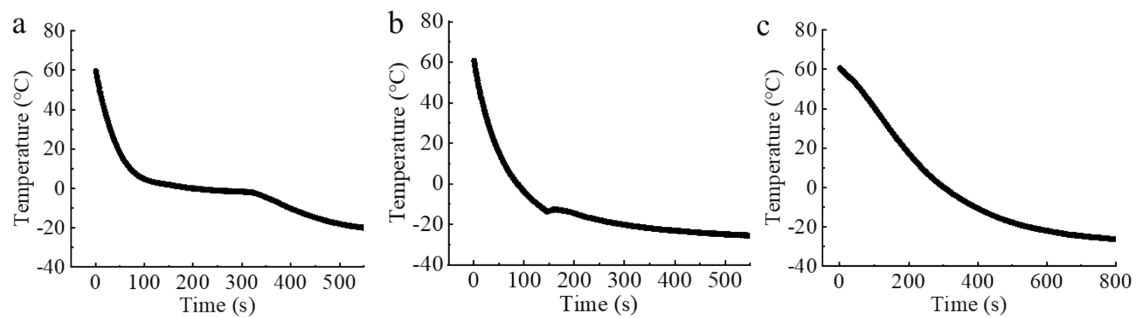

**Figure S10.** The cooling curve of the (a) water, (b) unsaturated NaAc solution and (c) supersaturated NaAc solution.

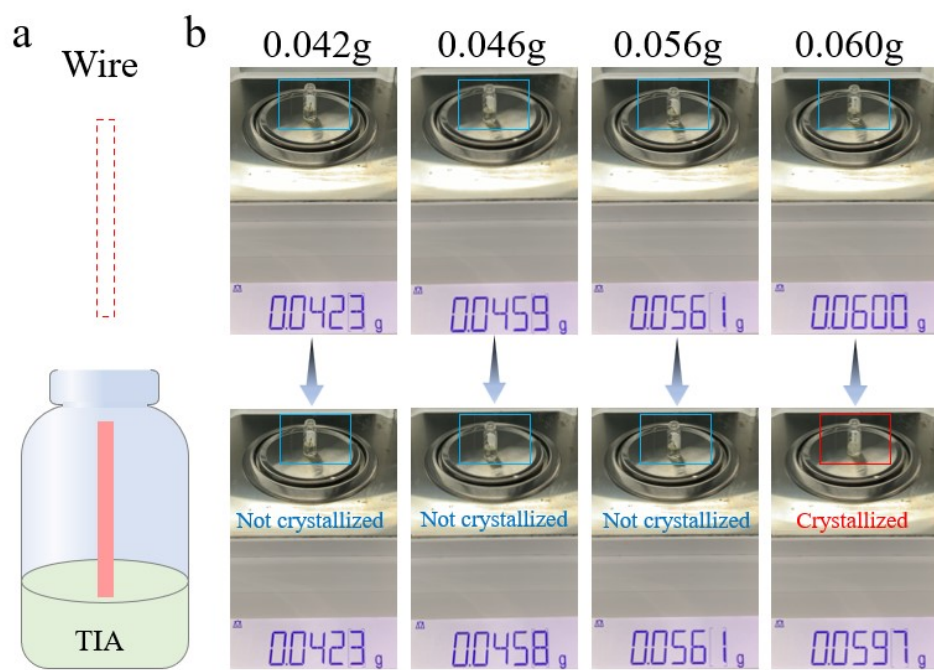

**Figure S11.** (a) Schematic diagram of a metal wire impacting on TIA. (b) Snapshots of TIA under impact of metal wires with different weights.

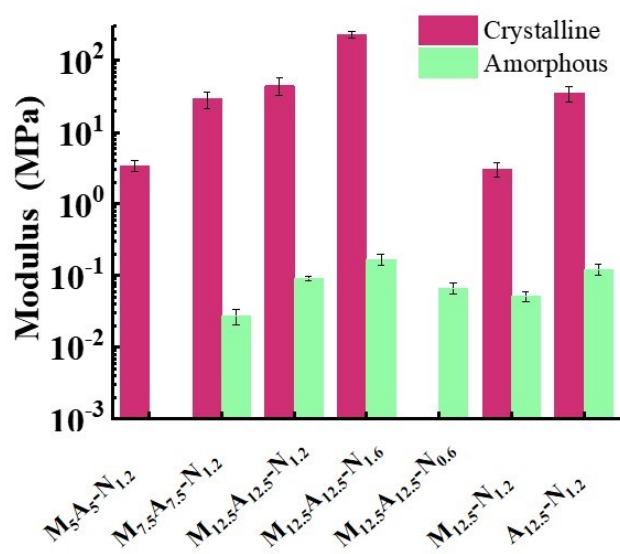

**Figure S12.** Moduli of hydrogels with different compositions
